# Supplementary material
Source: MDPI journal article supplement (https://www.mdpi.com/1996-1073/13/14/3707)
Supplement: s1 [file s1]

## Supplementary Material

### Green diesel production over nickel-alumina nanostructured catalysts promoted by copper

Mantha Gousi<sup>1</sup>, Eleana Kordouli<sup>1,2</sup>, Kyriakos Bourikas<sup>2\*</sup>, Emmanouil Symianakis<sup>3</sup>, Spyros Ladas<sup>3</sup>, Christos Kordulis<sup>1,2,4</sup>, Alexis Lycourghiotis<sup>1</sup>

<sup>1</sup>Department of Chemistry, University of Patras, GR-26504, Patras, Greece

<sup>2</sup>School of Science and Technology, Hellenic Open University, Tsamadou 13-15, GR-26222, Patras, Greece

<sup>3</sup>Surface Science Laboratory, Department of Chemical Engineering, University of Patras, GR-26504, Patras, Greece

<sup>4</sup>Foundation for Research and Technology, Institute of Chemical Engineering Science (FORTH/ICE-HT), Stadiou str., Platani, P.O. Box 1414, GR-26500, Patras, Greece

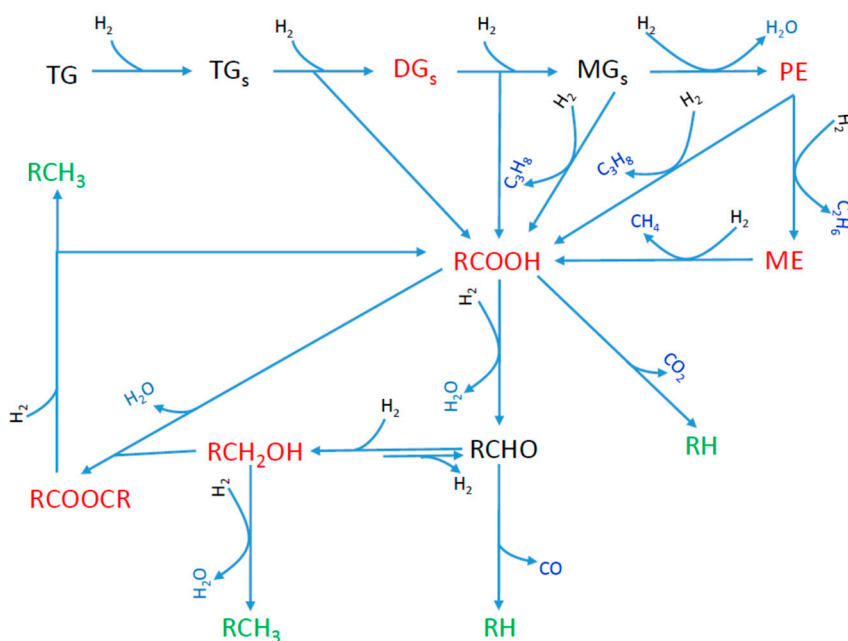

**Figure S1.** SDO reaction network. By TG, TG<sub>s</sub>, DG<sub>s</sub>, MG<sub>s</sub>, PE, and ME we are symbolizing, respectively, the initial triglycerides, the saturated triglycerides, the saturated diglycerides, the saturated monoglycerides, the propyl-esters, and methyl-esters. The other molecules are represented by their chemical formulas.

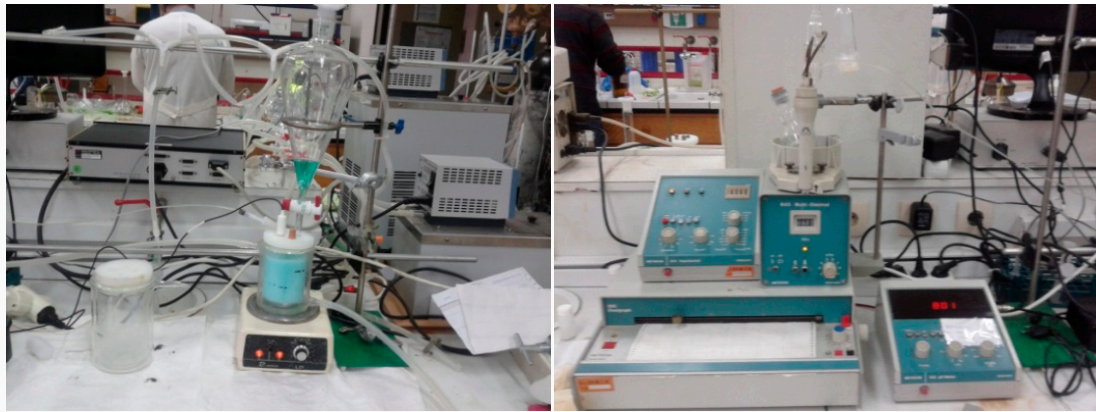

**Figure S2.** Presentation of the setup used for co-precipitation. **(Left).** The setup includes a glass funnel containing the mixed aqueous solution of  $\text{Ni}^{2+}$ ,  $\text{Al}^{3+}$  and  $\text{Cu}^{2+}$  nitrates and a double-walled glass vessel, with a cover, on a magnetic stirrer that initially contained 330mL of distilled water. During the experiment, the mixed solution from the glass funnel drips at a steady rate in the glass vessel. The setup also includes a glass electrode immersed in the glass vessel and a nozzle for adding  $\text{NH}_4\text{OH}$  solution into the vessel for keeping  $\text{pH}=8$  during co-precipitation process. **(Right).** A pH-control system (Mettrom) equipped with glass/saturated calomel electrode for stabilizing the  $\text{pH}=8$  at co-precipitation vessel during catalyst preparation introducing the necessary  $\text{NH}_4\text{OH}$  solution quantities.

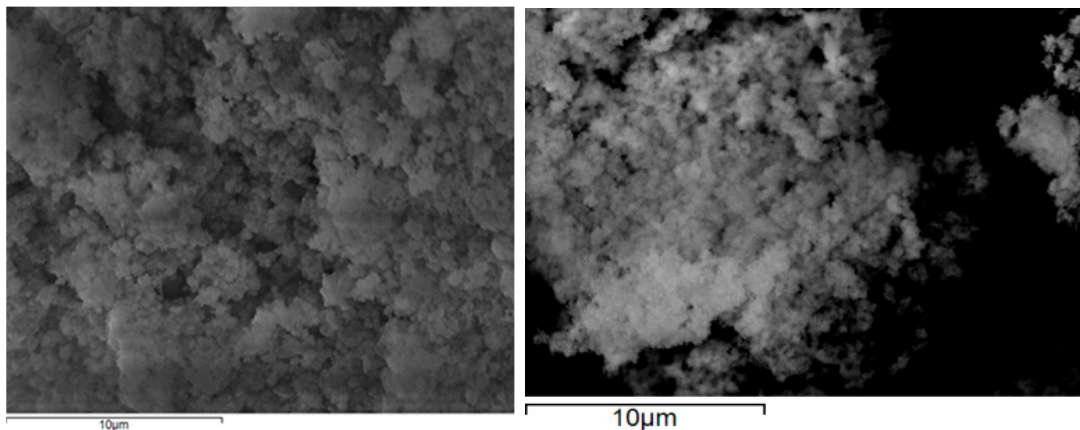

**Figure S3.** SEM images for the samples 60NiAl (left) and 58Ni2CuAl (right)

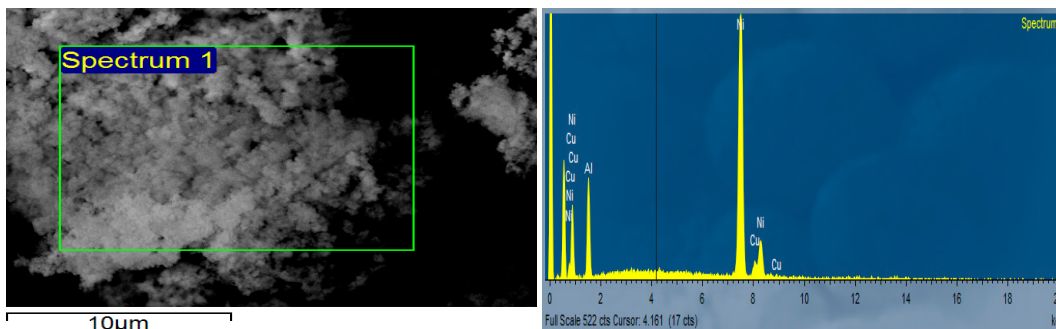

**Figure S4.** EDS spectrum (right) recorded for the 58Ni2CuAl catalyst in the Spectrum 1 region of the micrograph presented (left).

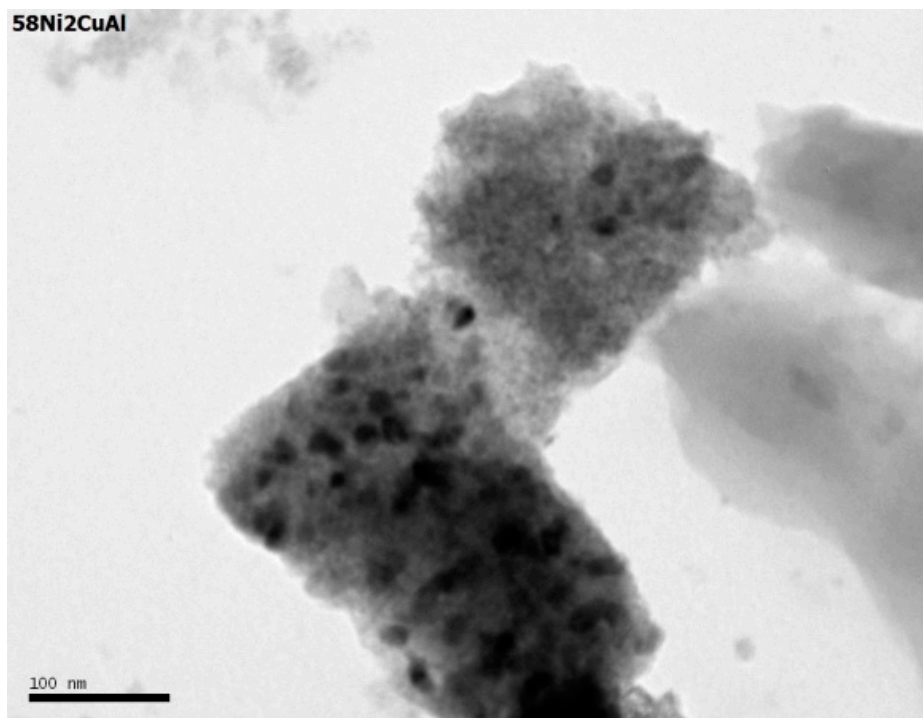

**Figure S5.** TEM image for the 58Ni2CuAl catalyst
